# Supplementary material for: Investigation into optical heating and applicability of the thermal sensor bifunctional properties of Yb3+ sensitized Tm3+ doped Y2O3, YAG and LaAlO3 phosphors
Source: Royal Society of Chemistry journal article supplement (doi:10.1039/c6ra15814e), 2016-01-01
Supplement: c6ra15814e1.pdf [file c6ra15814e1.pdf]

## Supporting Information

### **Investigation into Optical Heating and its Applicability as Thermal Sensor Bifunctional Properties of Yb<sup>3+</sup> Sensitized Tm<sup>3+</sup> Doped Y<sub>2</sub>O<sub>3</sub>, YAG and LaAlO<sub>3</sub> Phosphors**

Guofeng Liu<sup>a</sup>, Zuoling Fu<sup>\*a,b</sup>, Tianqi Sheng<sup>a</sup>, Zhen Sun<sup>a</sup>, Xiangtong Zhang<sup>a</sup>, Yanling Wei<sup>c</sup>, Li Ma<sup>b</sup>, Xiaojun Wang<sup>\*b</sup>, Zhijian Wu<sup>d</sup>

<sup>a</sup> *Key Laboratory of Coherent Light, Atomic and Molecular Spectroscopy, College of Physics, Jilin University, Changchun 130012, China, Fax: +86-431- 85167966; Tel: +86-431-85167966; E-mail: [zlfu@jlu.edu.cn](mailto:zlfu@jlu.edu.cn) (Z. L. Fu)*

<sup>b</sup> *Department of Physics, Georgia Southern University, Statesboro, USA, Fax: +1912-478-0471; Tel: +1912-478-5503; E-mail: [xwang@GeorgiaSouthern.edu](mailto:xwang@GeorgiaSouthern.edu) (X. J. Wang)*

<sup>c</sup> *School of Media and Mathematics & Physics, Jilin Engineering Normal University, Changchun 130012, China*

<sup>d</sup> *State Key Laboratory of Rare Earth Resources Utilization, Changchun Institute of Applied Chemistry, Chinese Academy of Sciences, Changchun 130022, China*

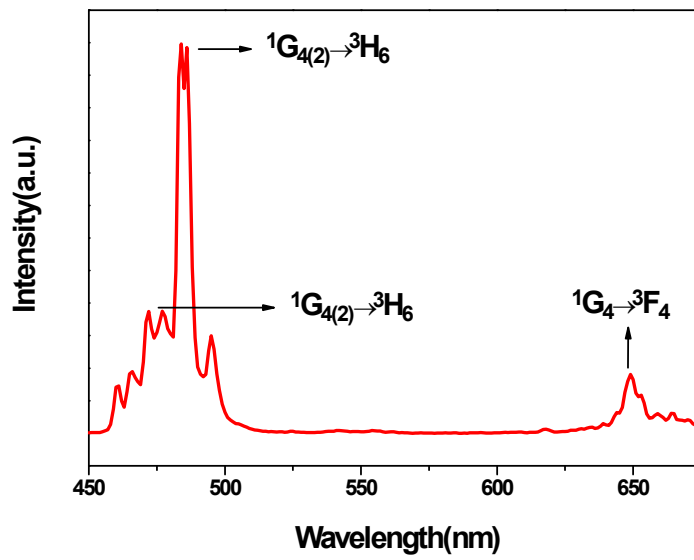

**Figure S1** The UC emission spectrum of the  $\text{Yb}^{3+}/\text{Tm}^{3+}$  co-doped YAG phosphor under the excitation of 980 nm diode laser.

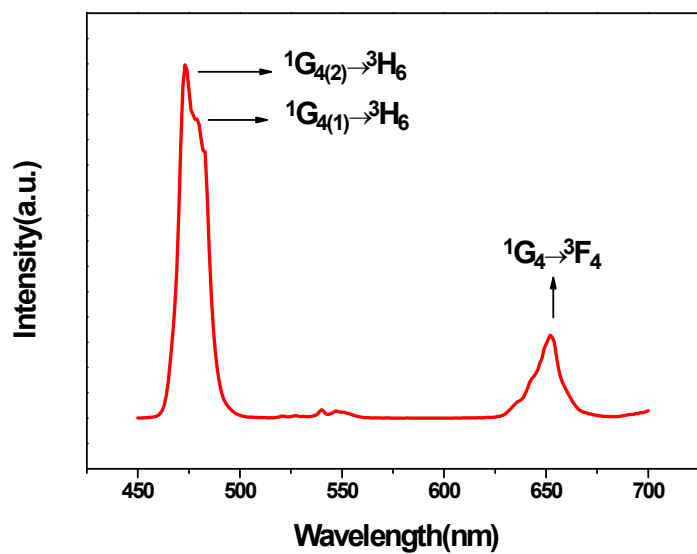

**Figure S2** The UC emission spectrum of the Yb<sup>3+</sup>/Tm<sup>3+</sup> co-doped LaAlO<sub>3</sub> phosphor under the excitation of 980 nm diode laser.

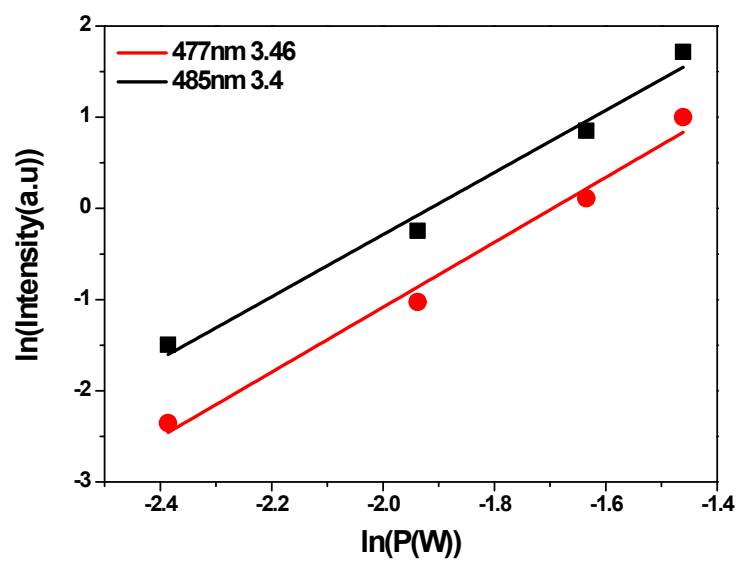

**Figure S3** The log-log plots of UC emission intensity of YAG: 0.1%Tm<sup>3+</sup>, 2%Yb<sup>3+</sup> as a function of a 980 nm laser pumping power.

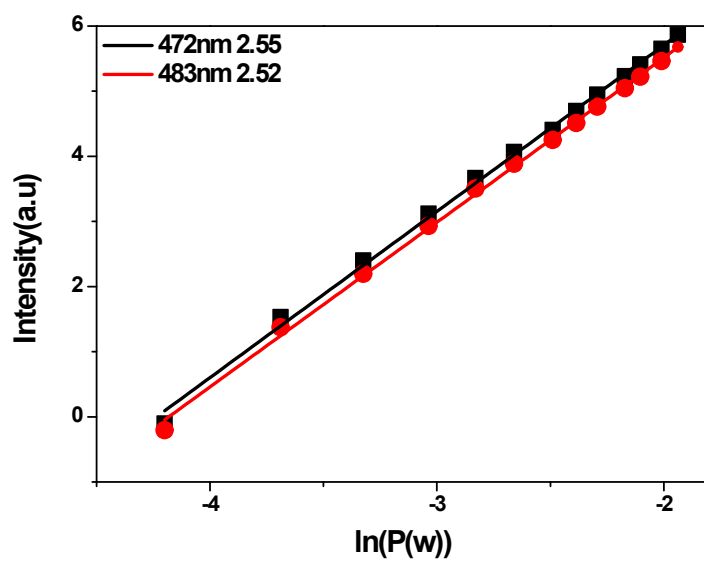

**Figure S4** The log-log plots of UC emission intensity of LaAlO<sub>3</sub>: 0.1%Tm<sup>3+</sup>, 2%Yb<sup>3+</sup> as a function of a 980 nm laser pumping power.

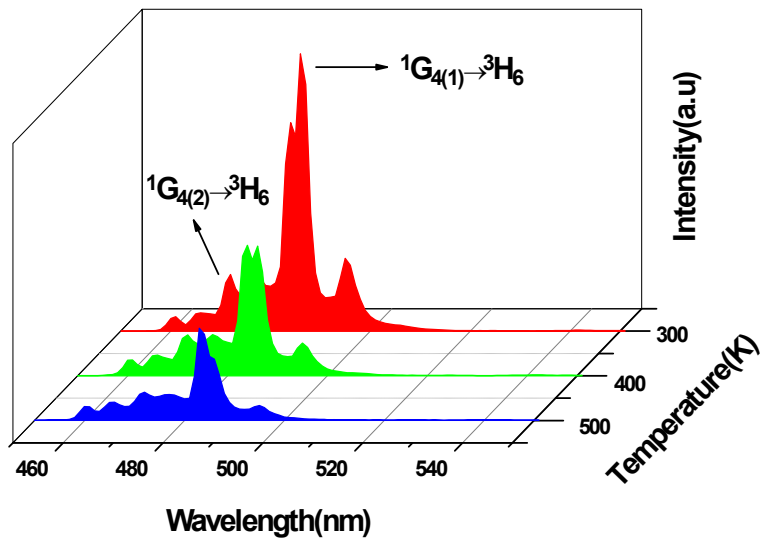

**Figure S5** Temperature evolution of the Tm<sup>3+</sup> blue UC emission spectra excited by 980 nm pump laser for the YAG: 0.1%Tm<sup>3+</sup>, 2% Yb<sup>3+</sup> phosphor at 300 K, 400 K and 500 K.

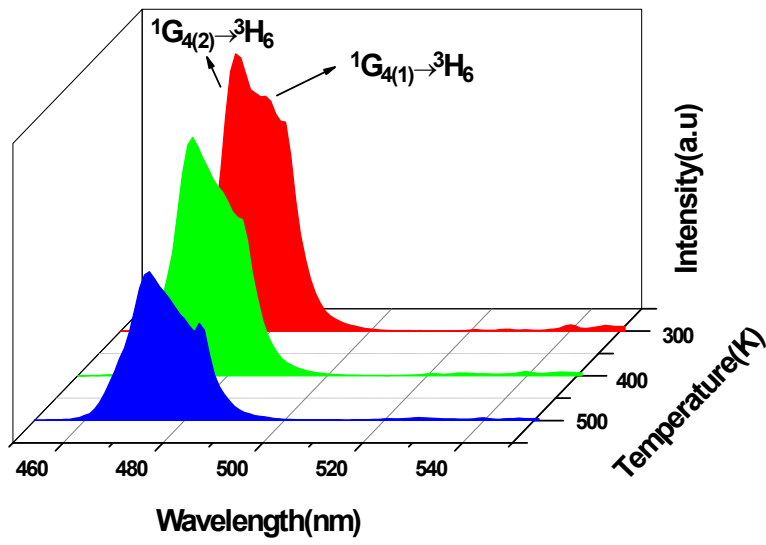

**Figure S6** Temperature evolution of the Tm<sup>3+</sup> blue UC emission spectra excited by 980 nm pump laser for the LaAlO<sub>3</sub>: 0.1%Tm<sup>3+</sup>, 2% Yb<sup>3+</sup> phosphor at 300 K, 400 K and 500 K.

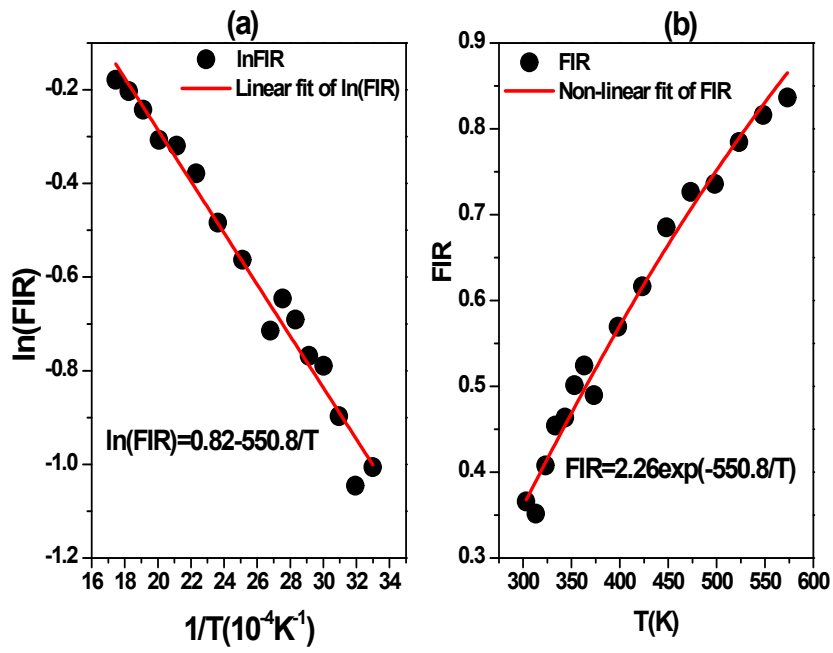

**Figure S7** (a) The monolog plot of the FIR versus  $1/T$  for the YAG phosphor; (b) FIR ( $I_{477}/I_{485}$ ) of  $\text{Tm}^{3+}$  blue UC emissions for the  ${}^1\text{G}_{4(2)}/{}^1\text{G}_{4(1)} \rightarrow {}^3\text{H}_6$  transitions as a function of temperature in the range of 303-573 K.



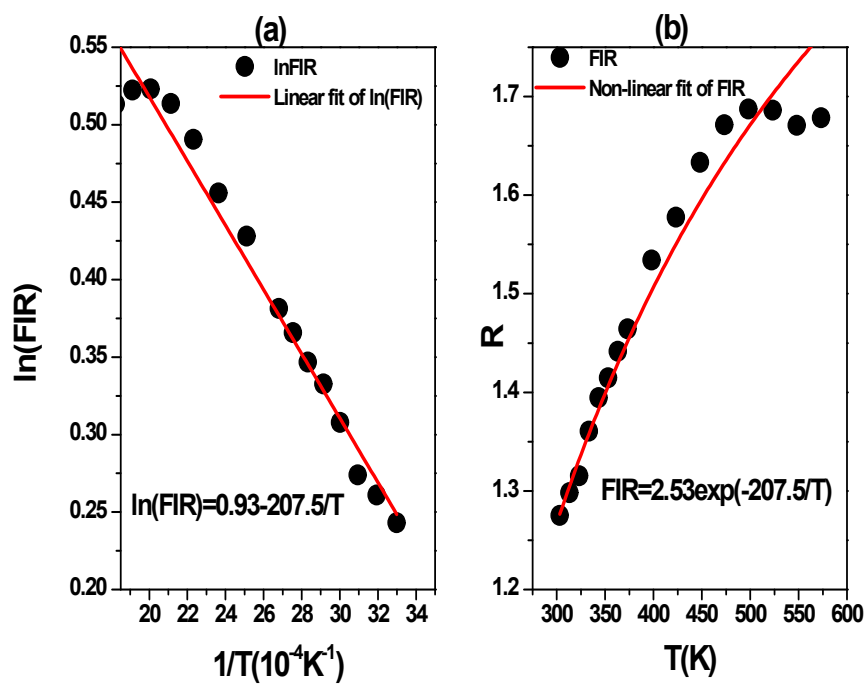

**Figure S8** (a) The monolog plot of the FIR versus  $1/T$  for the  $\text{LaAlO}_3$  phosphor; (b) FIR ( $I_{472}/I_{483}$ ) of  $\text{Tm}^{3+}$  blue UC emissions for the  ${}^1\text{G}_{4(2)}/{}^1\text{G}_{4(1)} \rightarrow {}^3\text{H}_6$  transitions as a function of temperature in the range of 303-573 K.

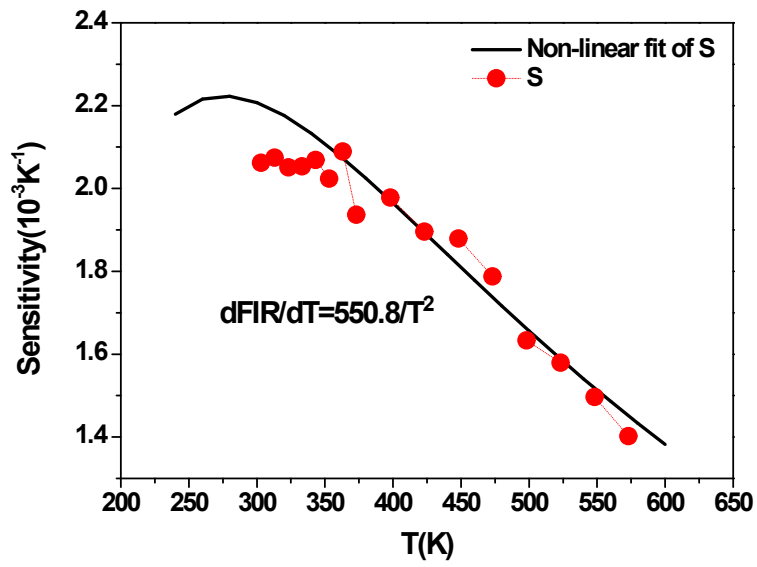

**Figure S9** The sensor sensitivity  $S = dFIR/dT$  as a function of the temperature for YAG : 0.1%Tm<sup>3+</sup>, 2%Yb<sup>3+</sup> phosphor.

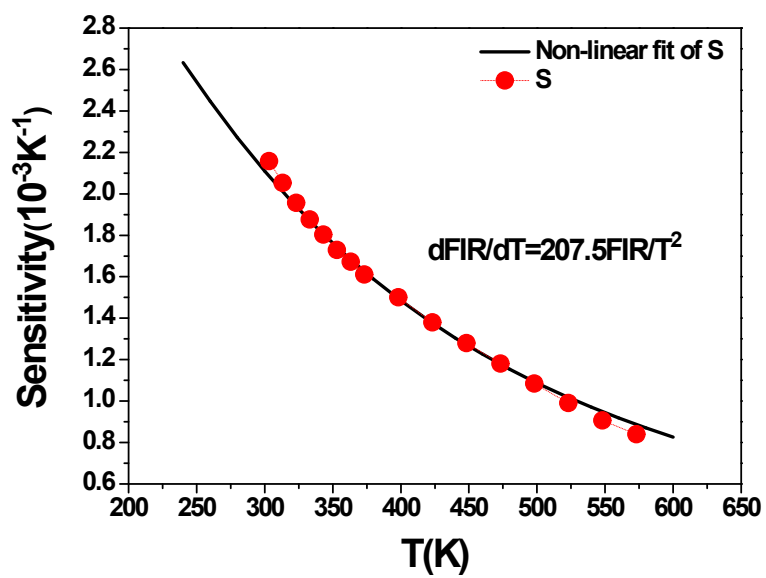

**Figure S10** The sensor sensitivity  $S = dFIR/dT$  as a function of the temperature for  $LaAlO_3 : 0.1\%Tm^{3+}, 2\%Yb^{3+}$  phosphor.

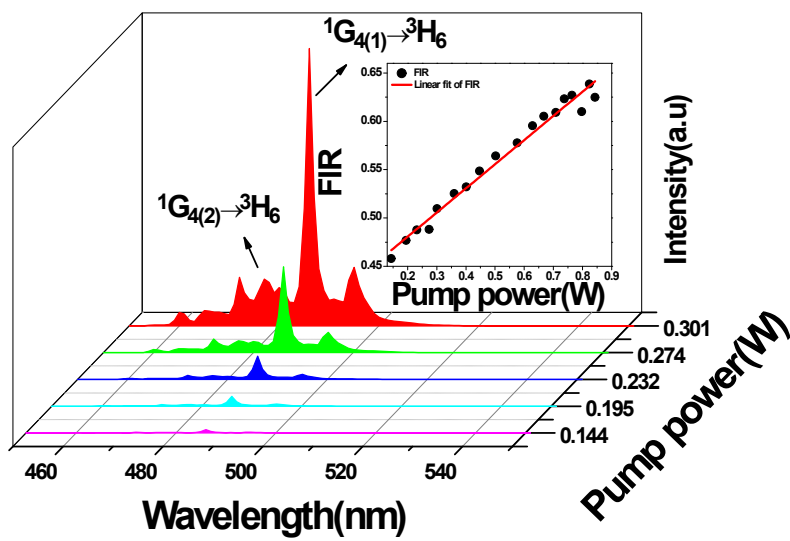

**Figure S11** The UCL spectra of the blue bands  $^1G_{4(2)}/^1G_{4(1)} \rightarrow ^3H_6$  of  $Tm^{3+}$  with different pumping power for YAG: 0.1% $Tm^{3+}$ , 2% $Yb^{3+}$ . Inset: FIR as a function of laser pump power.

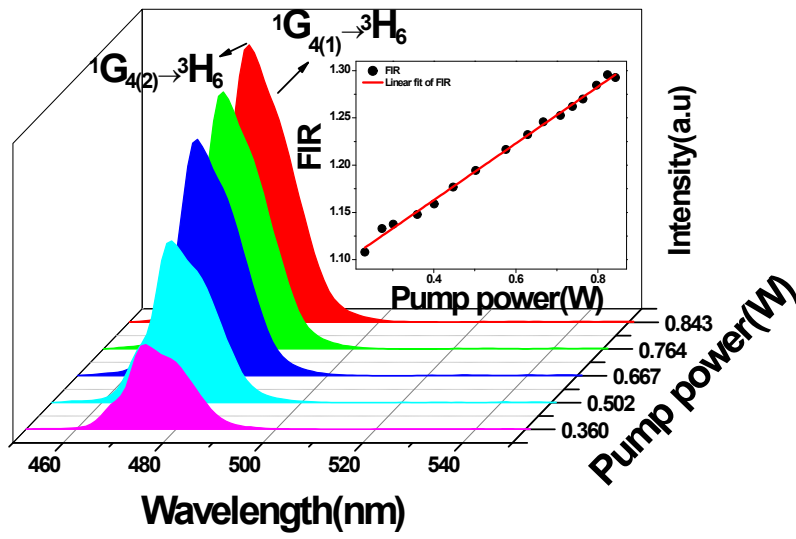

**Figure S12** The UCL spectra of the blue bands  ${}^1G_{4(2)}/{}^1G_{4(1)} \rightarrow {}^3H_6$  of  $\text{Tm}^{3+}$  with different pumping power for  $\text{LaAlO}_3: 0.1\% \text{Tm}^{3+}, 2\% \text{Yb}^{3+}$ . Inset: FIR as a function of laser pump power.

**The relationship of chemical bond covalency with the upconversion luminescence as well as temperature sensing property.**

The fluorescence intensity ratio of two upconversion emissions, which come from thermally coupled energy levels (TCLs) of rare earth ions, can be written as follows [1-4]:

$$FIR = \frac{I_2}{I_1} = \frac{N_2 A_2 h \nu_2}{N_1 A_1 h \nu_1}, \quad (1)$$

where  $I_2$  and  $I_1$  are the integrated intensities of the transitions of  ${}^1G_{4(2)} \rightarrow {}^3H_6$  and  ${}^1G_{4(1)} \rightarrow {}^3H_6$ , respectively ( $Tm^{3+}$ ).  $N_2$  and  $N_1$  the corresponding populations, and  $A_2$  and  $A_1$  the spontaneous-emission rates of  ${}^1G_{4(2)}$  and  ${}^1G_{4(1)}$  states, respectively. The energy gap of  ${}^1G_{4(2)}$  and  ${}^1G_{4(1)}$  is narrow, resulting in the electrons of  ${}^1G_{4(2)}$  level are easily populated to the  ${}^1G_{4(1)}$  by thermal excitation. Furthermore, the fluorescence intensity ratio (FIR) of TCLs can be written as follows [5]:

$$FIR = \frac{I_2}{I_1} = \frac{N_2 A_2 h \nu_2}{N_1 A_1 h \nu_1} = \frac{g_2}{g_1} \exp\left(\frac{-\Delta E}{K_B T}\right) \frac{h \nu_2 A_2}{h \nu_1 A_1}, \quad (2)$$

where  $g_2$ ,  $g_1$  are the degeneracy  $2J+1$  of the  ${}^1G_{4(2)}$  and  ${}^1G_{4(1)}$  levels, respectively.  $A_{fi}$  indicates the radiative transition probability from state  $f$  to  $i$  state based on Judd-Ofelt theory [6,7] and can be written as follows:

$$A_{fi} = \frac{64\pi^2 e^2 \nu^3}{3h g_f} \frac{(n^2 + 2)^2}{9n} \sum_{\lambda=2,4,6} \Omega_{\lambda} | \langle 4f^N (\alpha CL) J \| U^{(\lambda)} \| 4f^N (\alpha' C' L' J') \rangle |^2, \quad (3)$$

where  $\nu$  is the energy of transition between the two multiplets,  $U^{(\lambda)}$  ( $\lambda=2, 4, 6$ ) denotes the unit tensor operators of rank  $\lambda$  and  $\Omega_{\lambda}$  is the J-O intensity parameters. The terms  $| \langle 4f^N (\alpha CL) J \| U^{(\lambda)} \| 4f^N (\alpha' C' L' J') \rangle |^2$  represent the reduced matrix elements. In particular, the electric-dipole line strength  $C$  is expressed [6-8]:

$$\begin{aligned}
C &= g_i \langle f | \mu | i \rangle^2 = \sum_m \langle f | \mu | i, m \rangle^2 \\
&= \sum_{\lambda=2,4,6} \Omega_\lambda \langle 4f^N (\alpha CL) J \| U^{(\lambda)} \| 4f^N (\alpha' C' L' J') \rangle^2.
\end{aligned} \tag{4}$$

Then the FIR of  ${}^1G_{4(2)}, {}^1G_{4(1)} \rightarrow {}^3H_6$  transitions of  $Tm^{3+}$  can be given that

$$\begin{aligned}
FIR &= \exp\left(\frac{-\Delta E}{K_B T}\right) \frac{\nu_2^4 C_2}{\nu_1^4 C_1} \\
&= \exp\left(\frac{-\Delta E}{K_B T}\right) \frac{\nu_2^4}{\nu_1^4} \left( \frac{\Omega_2 * 0.7158 + \Omega_4 * 0.4138}{0.2225 * \Omega_6} + 0.0927 / 0.2225 \right) \\
&= B \exp\left(\frac{-\Delta E}{K_B T}\right),
\end{aligned} \tag{5}$$

where

$$\begin{aligned}
B &= \frac{\nu_2^4}{\nu_1^4} \left[ \frac{\Omega_2 * 0.7158 + \Omega_4 * 0.4138}{0.2225 * \Omega_6} + 0.0927 / 0.2225 \right] \\
&\approx \frac{\Omega_2 * 0.7158 + \Omega_4 * 0.4138}{0.2225 * \Omega_6} + 0.0927 / 0.2225.
\end{aligned} \tag{6}$$

In view of the fact that  $\nu_2^4 / \nu_1^4$  approaches 1, B is mainly decided by  $\Omega_{\lambda=2,4,6}$ . Crystal parameter  $\Omega_\lambda$  denotes some properties of materials. The  $\Omega_6$  parameter depends on the rigidity of the medium in which the ions are situated. The  $\Omega_2$  is related to the symmetry. It is sensitive to the change of constituent of materials, because crystal structures, bond lengths and covalency are different and then nephelauxetic effects are not the same. It's more sensitive to the environments than others among J-O parameters. So the B is finally decided by  $\Omega_2$ . In fact, the  $\Omega_2$  parameter is strongly affected by covalent chemical bonding, which has been studied by Jorgensen and Yang [4, 9]. In other words, the B value is strongly affected by covalent chemical bonding [10-12]. However, they just gave the qualitative dependence of the B value with the covalent chemical bonding.

In fact, the sensor sensitivity can be written as follows:

$$S = \frac{dFIR}{dT} = FIR \left( \frac{\Delta E}{K_B T^2} \right) = B \frac{\Delta E}{K_B T^2} \exp\left(\frac{-\Delta E}{K_B T}\right). \tag{7}$$

Generally, the energy gap  $\Delta E$  is decided by the even-parity of the crystal field of the

hosts and related to the symmetries of the crystal system. Then the S is mainly determined by B. That is to say, the sensor sensitivity is proportional to the bond covalency, which is discussed in detail in the revised manuscript. According to the chemical bond theory, the covalent  $f_c$  and ionic  $f_i$  of chemical bond as follows [13]:

$$f_c = \frac{(E_h^\mu)^2}{(E_g^\mu)^2}, \quad (8)$$

$$f_i = \frac{(C^\mu)^2}{(E_g^\mu)^2}. \quad (9)$$

According to the equations (1)-(7) above, it is well known that the sensor sensitivity is related to B, which is strongly affected by covalent chemical bonding  $f_c$ . Thus the sensor sensitivity can be judged by analyzing the ligand covalency, which is our goal in this work.

[1] E. Maurice, G.Monnom, B.Dussardier, A.Saïssy, D.B.O. strowsky, G.W. Baxter, Erbium-doped silica Fibers For intrinsic Fiber-optic Temperature Sensors, *Appl. Opt.*, 1995, **34**, 8019–8025.

[2] M.D. Shinn, W.A. Sibley, M.G. Drexhage, R.N. Brown, Optical Transitions of  $\text{Er}^{3+}$  Ions in Fluorozirconate glass, *Phys. Rev. B*, 1983, **27**, 6635–6648.

[3] S.A. Wade, S.F. Collins, G.W. Baxter, Fluorescence Intensity Ratio Technique for Optical Fiber Point Temperature Sensing, *J. Appl. Phys.*, 2003, **94**, 4743–4756.

[4] Y.M. Yang, C.A. Mi, F. Yu, X.Y. Su, C.F. Guo, G. Li, J. Zhang, L. Liu, Y.Z. Liu and X.D. Li, Optical Thermometry Based on the Upconversion Fluorescence from  $\text{Yb}^{3+}/\text{Er}^{3+}$  Codoped  $\text{La}_2\text{O}_2\text{S}$  Phosphor, *Ceram. Int.*, 2014, **40**, 9875-9880.

[5] G.S. Maciel, L.deS. Menezes, A.S.L. Gomes, C.B. de Araújo, Y. Messaddeq, A. Florez, M.A. Aegerter, Temperature Sensor Based on Frequency Upconversion in  $\text{Er}^{3+}$ -doped Fluorotellurite Glass, *IEEE Photo-nics Technol. Lett.*, 1995, **7**, 1474–1476.

[6] B.R. Judd, Optical Absorption Intensities of Rare Earth Ions, *Phys. Rev.*, 1962, **127**, 750–761.

[7] G.S. Ofelt, Intensities of Crystal Spectra of Rare Earth Ions, *J. Chem. Phys.*, 1962, **37**, 511–521.



- [8] C.K. Jorgensen, B.R. Judd, Hypersensitive Pseudoquadrupole Transitions in Lanthanides, *Mol. Phys*, 1964, **8**, 281–290.
- [9] C.K. Jorgensen, R. Reisfeld, Judd–Ofelt parameters and chemical bonding, *J. Less-Common Met*, 1983, **93**, 107–112.
- [10] D.E. Henrie, G.R. Choppin, Environmental effects on f–f transitions: II. Hypersensitivity in some complexes of trivalent neodymium, *J. Chem. Phys*, 1968, **49**, 477–481.
- [11] Z.J. Wu, M. Yang, S.Y. Zhang, Calculation of chemical bond parameters in  $\text{La}_{1-x}\text{Nd}_x\text{CrO}_3$  ( $0.0 < x < 1.0$ ), *Chem. Res*, 2001, **12**, 8–9.
- [12] Z.J. Wu, M. Yang, S.Y. Zhang, Calculation of bond covalency in  $\text{La}_{2-x}\text{Sr}_x\text{CuO}_4$  and  $\text{La}_{2-x}\text{Nd}_x\text{CuO}_{4+y}$ , *J. Mol. Sci*, 2000, **16**, 146–149.
- [13] B. F. Levine, Bond Susceptibilities and Ionicities in Complex Crystal Structures, *J. Chem. Phys.* 1973, **59**, 1463-1486.
